# Supplementary material
Source: PubMed Central journal article supplement (PMC4041940)
Supplement: 12192_2013_484_MOESM8_ESM.pdf [file 12192_2013_484_MOESM8_ESM.pdf]

Supplementary table A: Datasheets of *in silico* bindingscores of HSP70 epitopes

|                       | Amino acid nr | Amino acid sequence | Binding score | DR type   | Author                  |
|-----------------------|---------------|---------------------|---------------|-----------|-------------------------|
| <b>Region 38-52</b>   |               |                     |               |           |                         |
| Literature            | 38-52         | TPSYVAFTDTERLIG     | N.A.          | DR7       | (Chicz et al. 1993)     |
|                       | 38-54         | TPSYVAFTDTERLIGDA   | N.A.          | DR7       | (Chicz et al. 1993)     |
| Syfpeithi             | 44            | FTDTERLIG           | 24            | DR1       |                         |
|                       | 39            | PSYVAFTDT           | 20            | DR4       |                         |
|                       | 39            | PSYVAFTDT           | 32            | DR7       |                         |
|                       | 41            | YVAFTDTER           | 27            | DR11      |                         |
| Rankpep               | 40            | SYVAFTDTE           | 12.526        | DR7       |                         |
| Propred (DR4)         | 38            | TPSYVAFTD           | 0.941         | DR4       |                         |
|                       | 41            | YVAFTDTER           | 0.861         | DR4       |                         |
| Sette Algorithm       | 42            | VAFTDTERL           | 0             | —         |                         |
|                       | 50            | LIGDAAKNQ           | 0             | —         |                         |
| Chosen                | 38-52         | TPSYVAFTDTERLIG     |               |           |                         |
| <b>Region 168-186</b> |               |                     |               |           |                         |
| Literature            | 168-184       | NVLRIINEPTAAAIAYG   | N.A.          | DR4/DR53  | (Dengjel et al. 2005)   |
|                       | 168-182       | NVLRIINEPTAAAI      | N.A.          | HLA mix   | (Halder et al. 1997)    |
|                       | 172-186       | IINEPTAAAIAYGLD     | N.A.          | DQ6       | (Sanjeevi et al. 2002)  |
|                       | 167-184       | LNVLRIINEPTAAAIAYG  | N.A.          | DRB1*0401 | (Muntasell et al. 2004) |
| Syfpeithi             | 167           | LNVLRIINE           | 27            | DR1       |                         |
|                       | 170           | LRIINEPTA           | 25            | DR1       |                         |
|                       | 161           | AGTIAGLNV           | 24            | DR1       |                         |
|                       | 166           | GLNVLRIIN           | 26            | DR4       |                         |
|                       | 169           | VLRIINEPT           | 26            | DR4       |                         |
|                       | 167           | LNVLRIINE           | 20            | DR4       |                         |
|                       | 167           | LNVLRIINE           | 24            | DR7       |                         |
|                       | 178           | AAAIAYGLD           | 22            | DR7       |                         |
|                       | 167           | LNVLRIINE           | 18            | DR11      |                         |
| Rankpep               | 172           | IINEPTAAA           | 17.818        | DRB1*0101 |                         |
|                       | 177           | TAAAIAYGL           | 10.83         | DRB1*0101 |                         |
|                       | 172           | IINEPTAAA           | 12.862        | DRB4      |                         |
| Propred (DR4)         | 169           | VLRIINEPT           | 1.096         | DR4       |                         |
| Sette Algorithm       | 164           | IAGLNLVRI           | 3             | DR1/4/7   |                         |
|                       | 167           | LNVLRIINE           | 0             | —         |                         |
|                       | 172           | IINEPTAAA           | 2             | DR1/4     |                         |

|                       |         |                  |        |           |                       |
|-----------------------|---------|------------------|--------|-----------|-----------------------|
|                       | 173     | INEPTAAAI        | 2      | DR1/4     |                       |
| Chosen                | 161-175 | AGTIAGLNVLRRIINE |        |           |                       |
|                       | 167-181 | LNVLRRIINEPTAAAI |        |           |                       |
| <b>Region 238-252</b> |         |                  |        |           |                       |
| Literature            | 238-252 | VNHFIAEFKRKHKKD  | N.A.   | DR11w52   | (Newcomb et al. 1993) |
| Syfpeithi             | 239     | NHFIAEFKR        | 26     | DR4       |                       |
|                       | 235     | NRMVNHFIA        | 20     | DR4       |                       |
|                       | 232     | DFDNRMVNH        | 18     | DR4       |                       |
|                       | 232     | DFDNRMVNH        | 21     | DR11      |                       |
|                       | 238     | VNHFIAEFK        | 20     | DR11      |                       |
|                       | 242     | IAEFKRKHK        | 18     | DR11      |                       |
| Rankpep               | 234     | DNRMVNHFI        | 9.559  | DR1       |                       |
|                       | 241     | FIAEFKRKH        | 12.262 | DR4       |                       |
|                       | 234     | DNRMVNHFI        | 11.526 | DR7       |                       |
| Propred (DR4)         | 234     | DNRMVNHFI        | 0.891  | DR4       |                       |
| Sette Algorithm       | 233     | FDNRMVNHFI       | 0      | —         |                       |
|                       | 237     | MVNHFIAEF        | 2      | DR1/4     |                       |
|                       | 238     | VNHFIAEFK        | 0      | —         |                       |
| Chosen                | 235-249 | NRMVNHFIAEFKRKH  |        |           |                       |
| <b>Region 291-304</b> |         |                  |        |           |                       |
| Literature            | 291-304 | IDFYTSITRFFEE    | N.A.   | DR11w52   | (Newcomb et al. 1993) |
| Syfpeithi             | 291     | IDFYTSITR        | 25     | DR1       |                       |
|                       | 285     | DSLIEGIDF        | 24     | DR1       |                       |
|                       | 285     | DSLIEGIDF        | 22     | DR4       |                       |
|                       | 291     | IDFYTSITR        | 22     | DR4       |                       |
|                       | 294     | YTSITRARF        | 20     | DR4       |                       |
|                       | 287     | LYEGIDFYT        | 18     | DR4       |                       |
|                       | 290     | GIDFYTSIT        | 254    | DR7       |                       |
|                       | 291     | IDFYTSITR        | 22     | DR7       |                       |
|                       | 294     | YTSITRARF        | 22     | DR7       |                       |
|                       | 291     | IDFYTSITR        | 28     | DR11      |                       |
|                       | 285     | DSLIEGIDF        | 22     | DR11      |                       |
| Rankpep               | 293     | FYTSITRAR        | 9.474  | DR1       |                       |
|                       | 293     | FYTSITRAR        | 10.215 | DRB1*0401 |                       |
| Propred (DR4)         | 300     | ARFEELNAD        | 0.950  | DR4       |                       |
| Sette Algorithm       | 291     | IDFYTSITR        | 0      | —         |                       |
|                       | 293     | FYTSITRAR        | 2      | DR4/7     |                       |

|                       |         |                  |        |           |                        |
|-----------------------|---------|------------------|--------|-----------|------------------------|
|                       | 302     | FEELNADLF        | 0      | —         |                        |
| Chosen                | 290-304 | GIDFYTSITRARFEE  |        |           |                        |
| <b>Region 445-460</b> |         |                  |        |           |                        |
| Literature            | 445-457 | GERAMTKDNLLG     | N.A.   | DR4       | (Friede et al. 1996)   |
|                       | 445-460 | GERAMTKDNLLGKFE  | N.A.   | DR4/DR53  | (Dengjel et al. 2005)  |
| Syfpeithi             | 440     | IQVYEGERA        | 22     | DR4       |                        |
|                       | 439     | LIQVYEGER        | 20     | DR4       |                        |
|                       | 446     | ERAMTKDNN        | 20     | DR4       |                        |
|                       | 453     | NNLLGKFEL        | 20     | DR4       |                        |
|                       | 442     | VYEGERAMT        | 18     | DR4       |                        |
| Rankpep               | 443     | YEGERAMTK        | 9.358  | DRB1*0101 |                        |
|                       | 449     | MTKDNNLLG        | 13.235 | DRB1*0401 |                        |
|                       | 448     | AMTKDNLL         | 21.283 | DR7       |                        |
| Propred (DR4)         | 445     | GERAMTKDN        | 1.003  | DR4       |                        |
|                       | 442     | VYEGERAMTK       | 0.624  | DR4       |                        |
| Sette Algorithm       | 443     | YEGERAMTK        | 1      | DR4       |                        |
|                       | 456     | LGKFELTGI        | 0      | —         |                        |
| Chosen                | 443-457 | YEGERAMTKDNLLG   |        |           |                        |
| <b>Region 482-498</b> |         |                  |        |           |                        |
| Literature            | 482-498 | ANGILNVSVDKSTGKE |        | DR4       | (Lippolis et al. 2002) |
|                       | 484-497 | GILNVSVDKSTGK    |        | DR4       | (Lippolis et al. 2002) |
|                       | 484-498 | GILNVSVDKSTGKE   |        | DR4/DR53  | (Dengjel et al. 2005)  |
| Syfpeithi             | 482     | ANGILNVA         | 20     | DR4       |                        |
|                       | 486     | LNVSVDKS         | 18     | DR4       |                        |
|                       | 479     | DIDANGILN        | 18     | DR4       |                        |
|                       | 485     | ILNVSVDK         | 26     | DR11      |                        |
| Rankpep               | 475     | EVTFDIDAN        | 10.491 | DR4       |                        |
|                       | 484     | GILNVSVD         | 8.332  | DRB1*0401 |                        |
|                       | 482     | ANGILNVA         | 13.44  | DRB1*0102 |                        |
| Propred (DR4)         | 487     | NVSVDKST         | 0.634  | DR4       |                        |
| Sette Algorithm       | 480     | IDANGILNV        | 1      | DR1       |                        |
|                       | 485     | ILNVSVDK         | 0      | —         |                        |
|                       | 486     | LNVSVDKS         | 0      | —         |                        |
| Chosen                | 482-496 | ANGILNVSVDKSTG   |        |           |                        |

Supplementary table A. Peptide sequence selection was based upon regions of HSP70 described in literature as eluted from HLA (Chicz et al. 1993; Dengjel et al. 2005; Friede et al. 1996; Halder et al. 1997; Lippolis et al. 2002; Newcomb et al. 1993; Sanjeevi et al. 2002; Suri et al. 2005; Verreck et al. 1996). See for an overview of the literature table 2. Peptides sequences were screened for their theoretical MHC-binding motifs in the databases: Syfpeithi (<http://www.syfpeithi.de/home>), Rankpep (<http://bio.dfci.harvard.edu/RANKPEP/>), HLA-DR4Pred (<http://www.imtech.res.in/raghava/propred/index>), and the pan-DR binding computer algorithm of Sette (Southwood et al. 1998). Seven human HSP70-peptides were selected: H38 (38-52), H161 (161-175), H167 (167-181), H235 (235-249), H290 (290-304), H443 (443-457), H482 (482-496).
